# Supplementary material for: Synthesis of High Surface Area—Group 13—Metal Oxides via Atomic Layer Deposition on Mesoporous Silica
Source: MDPI journal article supplement (doi:10.3390/nano12091458), 2022-04-25
Supplement: s1 [file s1]

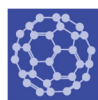

## Supplementary Material

# Synthesis of High Surface Area—Group 13—Metal Oxides via Atomic Layer Deposition on Mesoporous Silica

Robert Baumgarten <sup>1</sup>, Piyush Ingale <sup>1</sup>, Kristian Knemeyer <sup>1</sup>, Raoul Naumann d'Alnoncourt <sup>1,\*</sup>, Matthias Driess <sup>1,2</sup> and Frank Rosowski <sup>1,3</sup>

<sup>1</sup> BasCat—UniCat BASF JointLab, Technische Universität Berlin, Hardenberstraße 36, 10623 Berlin, Germany; r.baumgarten@bascat.tu-berlin.de (R.B.); p.ingale@bascat.tu-berlin.de (P.I.); k.knemeyer@bascat.tu-berlin.de (K.K.); matthias.driess@tu-berlin.de (M.D.); frank.rosowski@basf.com (F.R.)

<sup>2</sup> Institut für Chemie: Metallorganik und Anorganische Materialien, Technische Universität Berlin, Straße des 17. Juni 135, 10623 Berlin, Germany

<sup>3</sup> Process Research and Chemical Engineering, BASF SE, Carl-Bosch-Straße 38, 67056 Ludwigshafen, Germany

\* Correspondence: r.naumann@bascat.tu-berlin.de; Tel.: +49-30-314-73683

## 1. Synthesis of Reference Samples

**Materials:** Silica powder (SiO<sub>2</sub> amorphous, ≥99%, high-purity grade (Davisil Grade 636), average pore size 60 Å, 35–60 mesh particle size, specific surface area 505 m<sup>2</sup>/g, Sigma-Aldrich). Gallium and indium nitrate hydrate (Ga(NO<sub>3</sub>)<sub>3</sub> · xH<sub>2</sub>O and In(NO<sub>3</sub>)<sub>3</sub> · xH<sub>2</sub>O, 99.9% trace metals basis, Merck, Germany). Water (H<sub>2</sub>O, CHROMASOLV®, for HPLC, Riedel-de Haën/ Honeywell Specialty Chemicals Seelze GmbH, Seelze, Germany).

**Protocol:** Reference samples, supported on SiO<sub>2</sub>, were synthesized via incipient wetness impregnation (IWI). For the synthesis of Ga<sub>2</sub>O<sub>3</sub>/SiO<sub>2</sub> and In<sub>2</sub>O<sub>3</sub>/SiO<sub>2</sub>, the respective nitrate hydrate was added to HPLC-grade water to obtain the required volume for IWI of one gram of silica. After impregnation, the samples were dried in air at 80 °C for 12 h. Subsequently, the samples were calcined at 500°C for 3 h under 20% O<sub>2</sub>/N<sub>2</sub> (syn-air). The three-cycle ALD samples were calcined under same conditions for comparison.

Equations

$$\text{Added mass/mol(precursor)} = \frac{\text{mass(oxide)} \times M(\text{metal})}{\text{mass(metal)}} \quad (1)$$

Consideration: Amount of deposited metal equals chemisorbed precursor

$$\text{Layer thickness(oxide)} = \frac{\text{mass(oxide)}}{\rho(\text{oxide}) \times \text{surface area(substrate)}} \quad (2)$$

Consideration: Flat substrate surface and even oxide layer

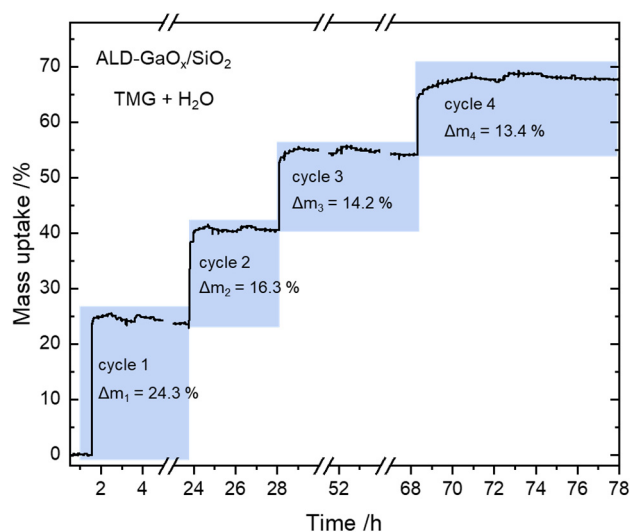

**Figure S1.** *In-situ* gravimetric monitoring of 4 ALD cycles  $\text{GaO}_x$  on  $\text{SiO}_2$  powder using the process of TMG/ $\text{H}_2\text{O}$  at  $150^\circ\text{C}$ . Mass-uptake =  $\Delta m/m_0$  ( $m_0 = \text{SiO}_2$ ).

**Table S1.** Metal-uptakes of Al, Ga and In on  $\text{SiO}_2$  within 3 cycles of ALD using TMX (X = A, G, I) and water. Values are calculated from thermogravimetric data (MSB) as described in chapter 3.1. Mass-uptake =  $\Delta m/m_0$  ( $m_0 = \text{SiO}_2$ ).

| Cycle Nr.  | Al-Metal [1]<br>Uptake /% | Ga-Metal<br>Uptake /% | In-Metal<br>Uptake /% | Uptake Ratio<br>(Al : Ga : In) | Molar Mass Ratio<br>(Al:Ga:In) |
|------------|---------------------------|-----------------------|-----------------------|--------------------------------|--------------------------------|
| 1 cycle    | + 8.7                     | + 18.1                | + 29.9                | 1:2.1:3.4                      | 1:2.6:4.3 (native)             |
| Ø 3 cycles | + 7.5                     | + 13.6                | + 35.5                | 1:1.8:4.7                      |                                |

## 2. Basic Consideration and Rationalization of the Changes in Surface Area and Pore Volume

### 2.1. Approximation (Density):

The specific surface areas are estimated based on the ALD-induced change of the substrate-mass, assuming no change of the exposed surface area (as discussed in chapter 3.2). The estimated (specific) surface areas and pore volumes are displayed in Table S2 (blue).

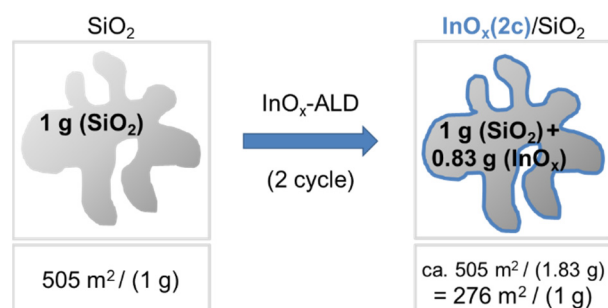

**Scheme S1.** Schematic description of model 1, based on two ALD cycles of  $\text{InO}_x$  on  $\text{SiO}_2$ .

**Table S2.** Estimated (blue) specific surface areas (ESA) and total pore volumes (EPV) of ALD-modified SiO<sub>2</sub> based on model 1. Values are compared to the measured values (green) from N<sub>2</sub> physisorption analysis (SA, PV). Mass-uptakes derive from thermogravimetric data.  $ESA = SA(SiO_2)/(1+mass-uptake)$ ,  $EPV = PV(SiO_2)/(1+mass-uptake)$ .

| GaO <sub>x</sub> /SiO <sub>2</sub> |                                     |                                    |                                      |                                     | InO <sub>x</sub> /SiO <sub>2</sub>  |                                    |                                      |                                     |
|------------------------------------|-------------------------------------|------------------------------------|--------------------------------------|-------------------------------------|-------------------------------------|------------------------------------|--------------------------------------|-------------------------------------|
| ALD cycle                          | ESA /m <sup>2</sup> g <sup>-1</sup> | SA /m <sup>2</sup> g <sup>-1</sup> | EPV /cm <sup>3</sup> g <sup>-1</sup> | PV /cm <sup>3</sup> g <sup>-1</sup> | ESA /m <sup>2</sup> g <sup>-1</sup> | SA /m <sup>2</sup> g <sup>-1</sup> | EPV /cm <sup>3</sup> g <sup>-1</sup> | PV /cm <sup>3</sup> g <sup>-1</sup> |
| 0 (SiO <sub>2</sub> )              | 505                                 |                                    | 0.79                                 |                                     | 505                                 |                                    | 0.79                                 |                                     |
| 1                                  | 406                                 | 336                                | 0.64                                 | 0.57                                | 364                                 | 277                                | 0.57                                 | 0.55                                |
| 2                                  | 359                                 | 296                                | 0.56                                 | 0.46                                | 276                                 | 216                                | 0.43                                 | 0.34                                |
| 3                                  | 326                                 | 259                                | 0.51                                 | 0.39                                | 221                                 | 142                                | 0.35                                 | 0.23                                |

## 2.2. Approximation (Geometric, Core-Shell):

The total surface area of silica is concentrated on (non-porous) spheres with a diameter of 4.48 nm (best fit), density of 2.65 g/cm<sup>3</sup> and no inter-particle volume. The sphere diameters are increased by a thin ALD layer of higher density (5.5 g/cm<sup>3</sup> for GaO<sub>x</sub> and 6.75 g/cm<sup>3</sup> for InO<sub>x</sub>, ref.: chapter 3.6). The layer is homogeneously distributed and its thickness is calculated using equation (2) (see chapter 3.6). The non-mass-related surface area of the sphere increases slightly while the mass-related (specific) surface area decreases drastically (Table S3).

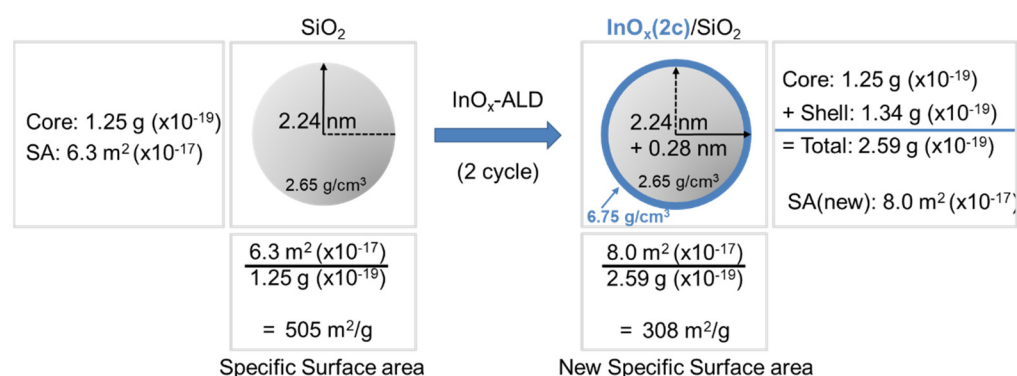

**Scheme S2.** Schematic description of model 2 (Core-shell), based on two ALD cycles of InO<sub>x</sub> on SiO<sub>2</sub>.

**Table S3.** Estimated (blue) specific surface area (ESA) and mass-uptake (EU<sub>p</sub>) of ALD-modified SiO<sub>2</sub> based on model 2. Values are compared to the measured values (green) from N<sub>2</sub> physisorption analysis (SA). Mass-uptakes (Up) derive from thermogravimetric data.  $ESA = SA(new)/(1 + mass-uptake)$ ,  $EU_p = \Delta m/m_0$  ( $m_0 = SiO_2$ ).

| GaO <sub>x</sub> /SiO <sub>2</sub> |                                     |                                    |                      |         | InO <sub>x</sub> /SiO <sub>2</sub>  |                                    |                      |         |
|------------------------------------|-------------------------------------|------------------------------------|----------------------|---------|-------------------------------------|------------------------------------|----------------------|---------|
| ALD cycle                          | ESA /m <sup>2</sup> g <sup>-1</sup> | SA /m <sup>2</sup> g <sup>-1</sup> | EU <sub>p</sub> /wt% | Up /wt% | ESA /m <sup>2</sup> g <sup>-1</sup> | SA /m <sup>2</sup> g <sup>-1</sup> | EU <sub>p</sub> /wt% | Up /wt% |
| 0 (SiO <sub>2</sub> )              | 505                                 |                                    | 0                    |         | 505                                 |                                    | 0                    |         |
| 1                                  | 434                                 | 336                                | 26                   | 24      | 399                                 | 277                                | 39                   | 39      |
| 2                                  | 393                                 | 296                                | 40                   | 48      | 308                                 | 216                                | 108                  | 83      |
| 3                                  | 364                                 | 259                                | 67                   | 55      | 252                                 | 142                                | 191                  | 129     |

## 2.3. Approximation (Volumetric):

The total pore volume and surface area of silica is concentrated inside spherical pores with a diameter of 9.39 nm (best fit) without connections between the pores. The number of pores is normalized to  $1.82 \times 10^{18}$  to reach the total pore volume and surface area of 1 g SiO<sub>2</sub> (0.79 cm<sup>3</sup> and 505 m<sup>2</sup>). The pore diameters are decreased by a homogeneously

distributed, thin ALD layers (see chapter 3.6 or equation (2)). Consequently, the inner surface area and pore volume of each pore decreases and the mass-based (specific) values as well (Table S4).

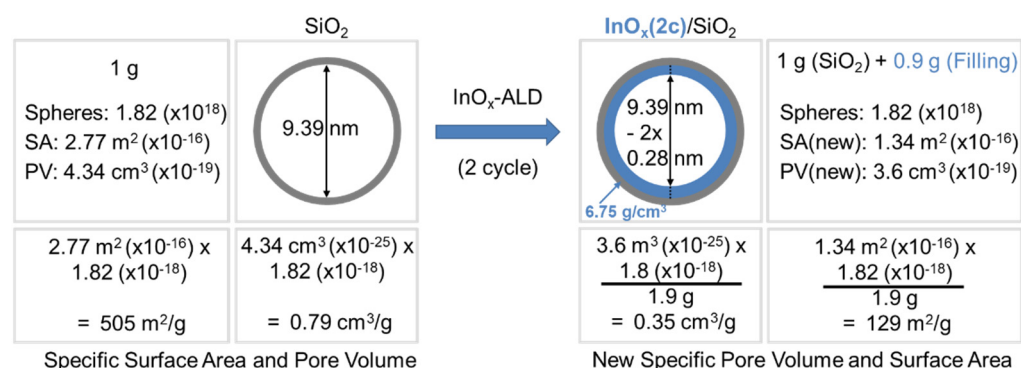

**Scheme S3.** Schematic description of model 3 (volumetric), based on two ALD cycles of InO<sub>x</sub> on SiO<sub>2</sub>.

**Table S4.** Estimated (blue) surface area (ESA) and pore volume (EPV) of ALD-modified SiO<sub>2</sub> based on model 3. Values are compared to the measured values (green) from N<sub>2</sub> physisorption analysis (SA).

| GaO <sub>x</sub> /SiO <sub>2</sub> |                                     |                                    |                      |                     |                      |         | InO <sub>x</sub> /SiO <sub>2</sub>  |                                    |                                      |                                     |                      |         |
|------------------------------------|-------------------------------------|------------------------------------|----------------------|---------------------|----------------------|---------|-------------------------------------|------------------------------------|--------------------------------------|-------------------------------------|----------------------|---------|
| ALD cycle                          | ESA /m <sup>2</sup> g <sup>-1</sup> | SA /m <sup>2</sup> g <sup>-1</sup> | EPV /cm <sup>3</sup> | PV /cm <sup>3</sup> | EU <sub>p</sub> /wt% | Up /wt% | ESA /m <sup>2</sup> g <sup>-1</sup> | SA /m <sup>2</sup> g <sup>-1</sup> | EPV /cm <sup>3</sup> g <sup>-1</sup> | PV /cm <sup>3</sup> g <sup>-1</sup> | EU <sub>p</sub> /wt% | Up /wt% |
| 0 (SiO <sub>2</sub> )              | 505                                 |                                    | 0.79                 |                     | 0                    | 0       | 505                                 |                                    | 0.79                                 |                                     | 0                    | 0       |
| 1                                  | 214                                 | 336                                | 0.60                 | 0.57                | 25                   | 24      | 193                                 | 277                                | 0.54                                 | 0.55                                | 37                   | 39      |
| 2                                  | 181                                 | 296                                | 0.50                 | 0.46                | 43                   | 48      | 129                                 | 216                                | 0.35                                 | 0.34                                | 90                   | 83      |
| 3                                  | 159                                 | 259                                | 0.43                 | 0.39                | 58                   | 55      | 93                                  | 142                                | 0.24                                 | 0.23                                | 142                  | 129     |

**Conclusion:** The three shown models are only rough approximations and do not fully reflect the reality. An exact model would lie somewhere in-between, yet with unknown proportions. However, the mass-uptakes, changes in specific surface areas and pore volumes are mostly in line with what was observed *via* measurements. Finally, the models justify and rationalize the drastically appearing decrease in surface areas and pore volumes by metal oxide ALD.

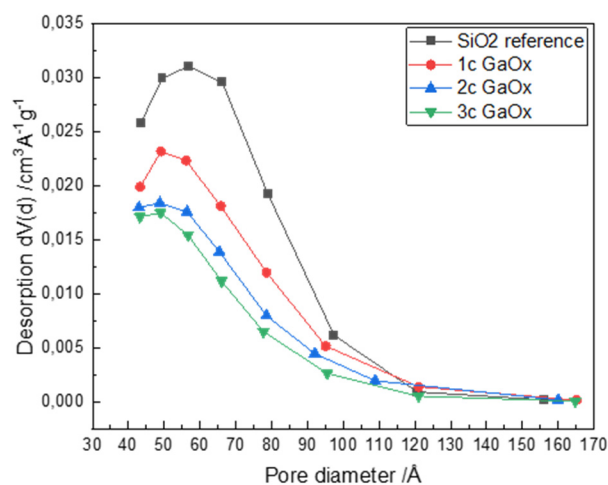

**Figure S2.** Differential pore size distributions of GaO<sub>x</sub> ALD modified SiO<sub>2</sub>, determined by the N<sub>2</sub> desorption branches and application of the BJH method. 1-3 cycles of GaO<sub>x</sub> ALD were conducted using TMG and water at 150°C.

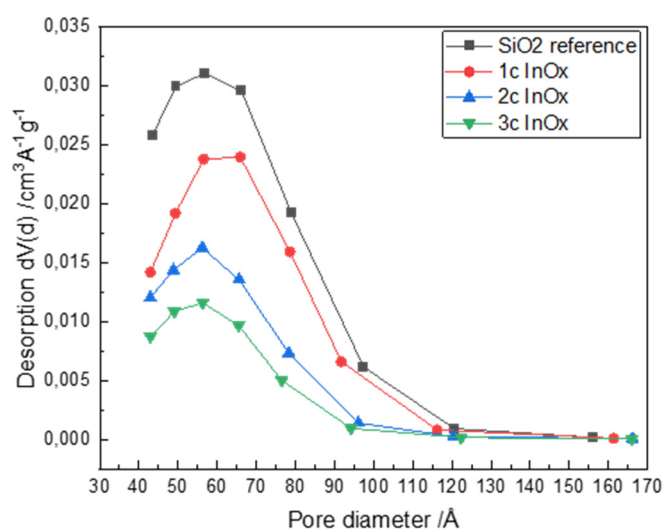

**Figure S3.** Differential pore size distributions of InO<sub>x</sub> ALD modified SiO<sub>2</sub>, determined by the N<sub>2</sub> desorption branches and application of the BJH method. 1-3 cycles of InO<sub>x</sub> ALD were conducted using TMI and water at 150°C.

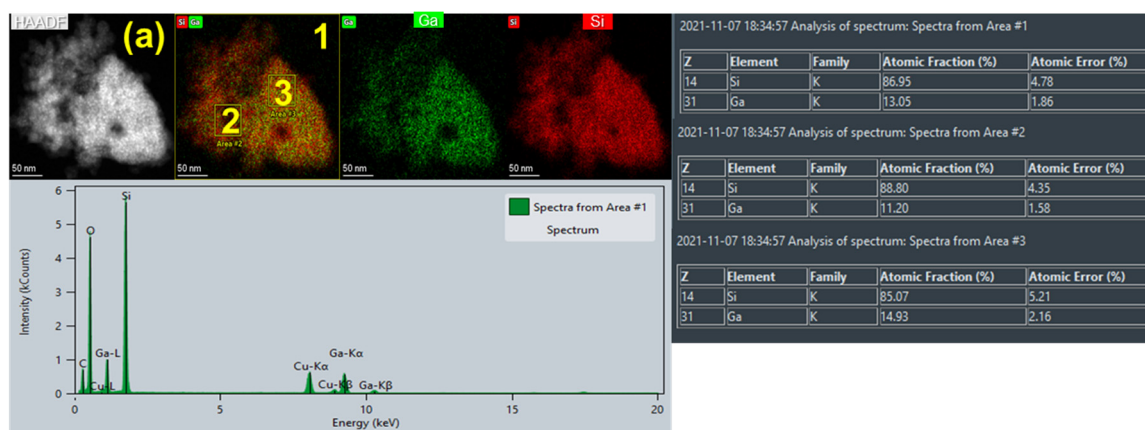

**Figure S4.** STEM-HAADF image and EDX-mappings of (a) 1 ALD cycle  $\text{GaO}_x$  on mesoporous  $\text{SiO}_2$ . For analysis of Area #1 the whole image was selected.

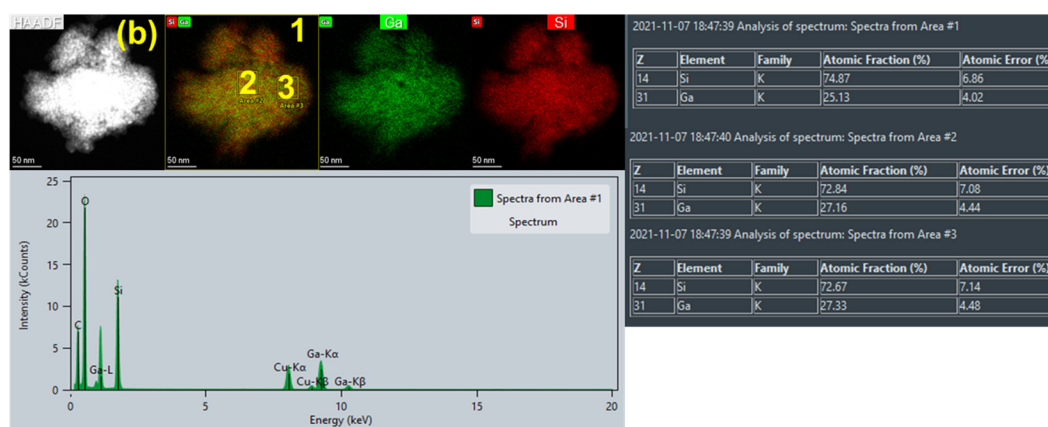

**Figure S5.** STEM-HAADF image and EDX-mappings of (b) 3 ALD cycle  $\text{GaO}_x$  on mesoporous  $\text{SiO}_2$ . For analysis of Area #1 the whole image was selected.

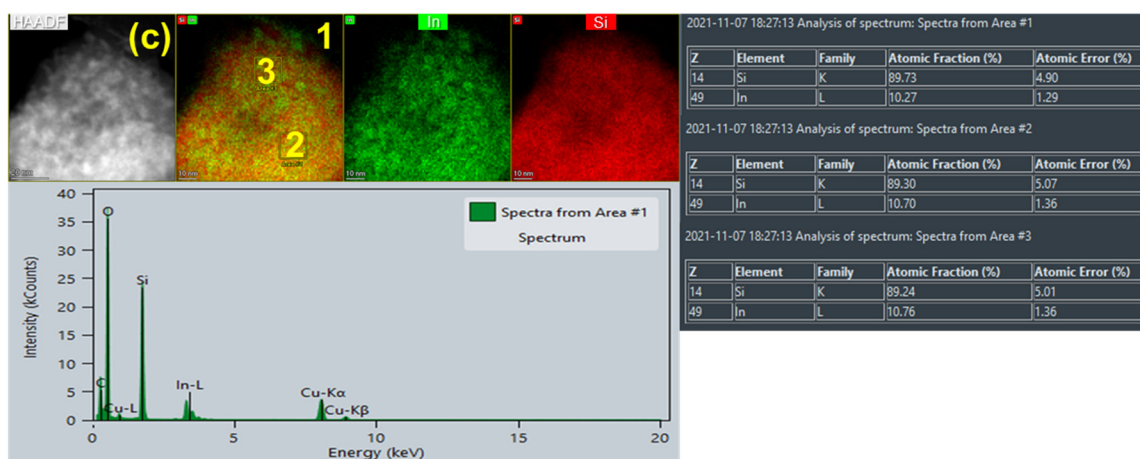

**Figure S6.** STEM-HAADF image and EDX-mappings of (c) 1 ALD cycle  $\text{InO}_x$  on mesoporous  $\text{SiO}_2$ . For analysis of Area #1 the whole image was selected.



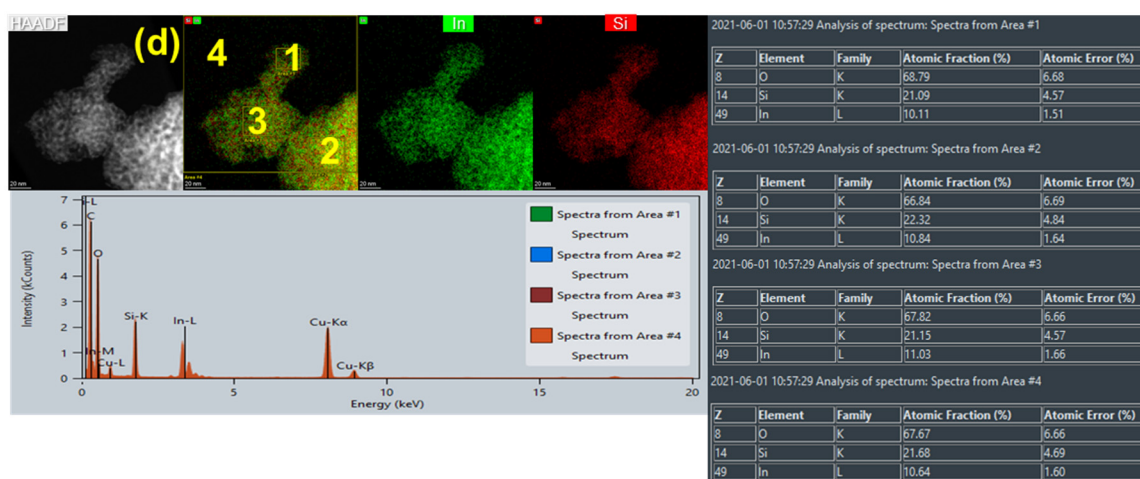

**Figure S7.** STEM-HAADF image and EDX-mappings of (d) 3 ALD cycle InO<sub>x</sub> on mesoporous SiO<sub>2</sub>. For analysis of Area #4 the whole image was selected.

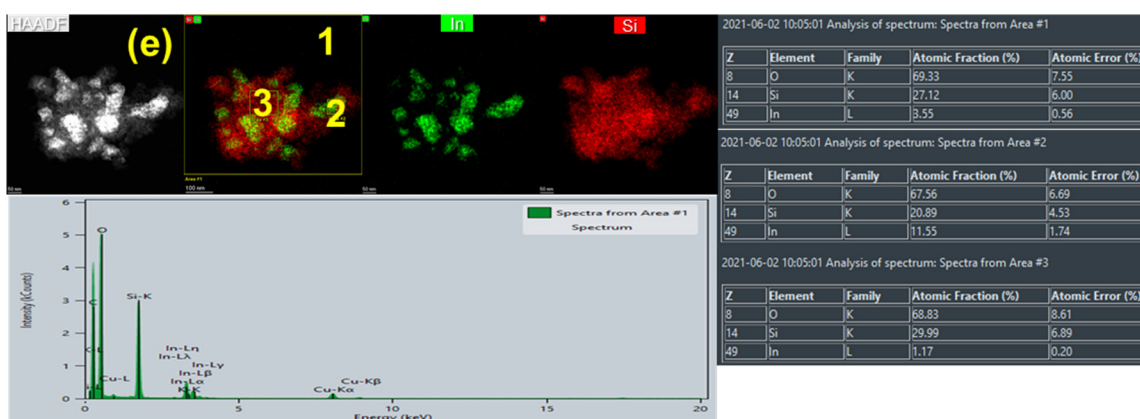

**Figure S8.** STEM-HAADF image and EDX-mappings of (e) impregnated In<sub>2</sub>O<sub>3</sub> (22 wt% In) on mesoporous SiO<sub>2</sub>. For analysis of Area #1 the whole image was selected.

**Table S5.** Fit parameters for the XPS scans of the Ga3d, In3d and O1s regions after GaO<sub>x</sub> and InO<sub>x</sub> ALD on SiO<sub>2</sub>. Shown are the peak positions, full width at half maxima (FWHM), the used L/G Mix and area ratios.

| Ga3d region (after GaO <sub>x</sub> ALD)     |                     |           |             |                     |           |             |            |
|----------------------------------------------|---------------------|-----------|-------------|---------------------|-----------|-------------|------------|
| Sample                                       | O2s                 |           |             | Ga3d (Ga2O3)        |           |             | Area ratio |
|                                              | Peak BE (eV)        | FWHM (eV) | L/G Mix (%) | Peak BE (eV)        | FWHM (eV) | L/G Mix (%) |            |
| GaO <sub>x</sub> /SiO <sub>2</sub> (1 cycle) | 24.68               | 3.23      | 30          | 20.66               | 2.78      | 30          | 0.62 to 1  |
| GaO <sub>x</sub> /SiO <sub>2</sub> (3 cycle) | 24.87               | 3.45      | 30          | 20.80               | 2.72      | 30          | 0.30 to 1  |
| In3d region (after InO <sub>x</sub> ALD)     |                     |           |             |                     |           |             |            |
| Sample                                       | In3d <sub>3/2</sub> |           |             | In3d <sub>5/2</sub> |           |             | Area ratio |
|                                              | Peak BE (eV)        | FWHM (eV) | L/G Mix (%) | Peak BE (eV)        | FWHM (eV) | L/G Mix (%) |            |
| InO <sub>x</sub> /SiO <sub>2</sub> (1 cycle) | 452.64              | 2.38      | 30          | 445.10              | 2.38      | 30          | 0.69 to 1  |
| InO <sub>x</sub> /SiO <sub>2</sub> (2 cycle) | 452.47              | 1.89      | 30          | 444.93              | 1.89      | 30          | 0.69 to 1  |
| InO <sub>x</sub> /SiO <sub>2</sub>           | 452.32              | 1.85      | 30          | 444.78              | 1.85      | 30          | 0.69 to 1  |

(3 cycle)

| O1s region (after InO <sub>x</sub> ALD)      |                          |           |             |                                        |           |             |            |
|----------------------------------------------|--------------------------|-----------|-------------|----------------------------------------|-----------|-------------|------------|
| Sample                                       | O-Si (SiO <sub>2</sub> ) |           |             | O-In (In <sub>2</sub> O <sub>3</sub> ) |           |             | Area ratio |
|                                              | Peak BE (eV)             | FWHM (eV) | L/G Mix (%) | Peak BE (eV)                           | FWHM (eV) | L/G Mix (%) |            |
| InO <sub>x</sub> /SiO <sub>2</sub> (1 cycle) | 532.25                   | 2.44      | 30          | 530.00                                 | 2.44      | 30          | 1 to 0.05  |
| InO <sub>x</sub> /SiO <sub>2</sub> (3 cycle) | 532.15                   | 1.91      | 30          | 530.22                                 | 1.90      | 30          | 1 to 0.30  |

## References

1. Stempel, V.E.; Knemeyer, K.; Naumann d'Alnoncourt, R.; Driess, M.; Rosowski, F. Investigating the Trimethylaluminium/Water ALD Process on Mesoporous Silica by In Situ Gravimetric Monitoring. *Nanomaterials* 2018, 8, 365. <https://doi.org/10.3390/nano8060365>.
